# Supplementary material for: Efficient perovskite/fullerene planar heterojunction solar cells with enhanced charge extraction and suppressed charge recombination
Source: Royal Society of Chemistry journal article supplement (doi:10.1039/c4nr06240j), 2015-01-01
Supplement: c4nr06240j1.pdf [file c4nr06240j1.pdf]

## **aEfficient perovskite/fullerene planar heterojunction solar cells with enhanced charge extraction and suppressed charge recombination**

Cong Li, Fuzhi Wang, Jia Xu, Jianxi Yao, Bing Zhang, Chunfeng Zhang, Min Xiao, Songyuan Dai\*, Yongfang Li, and Zhan'ao Tan\*,

To further clarify the photovoltaic characteristics, a model which is derived from the single heterojunction solar cell is used to analyze the  $J$ - $V$  characteristic of the device.

According to the equivalent circuit, the current density flowing through the external load, which is marked as  $J$  here, can be expressed in the following form,

$$J = J_L - J_0 \left[ \exp\left(\frac{e}{AK_B T}(V + JR_s)\right) - 1 \right] - \frac{V + JR_s}{R_{sh}} \quad (1)$$

where  $J_L$  and  $J_0$  are the light induced current density and reverse saturated current density of a  $pn$  heterojunction respectively,  $R_s$  and  $R_{sh}$  are the series and shunt resistance respectively,  $V$  is the bias voltage applied at the device,  $K_B$  is the Boltzmann constant,  $e$  is the elementary charge,  $T$  is the absolute temperature, and  $A$  is the ideality factor of a heterojunction.

When  $R_{sh}$  is very large, it can be deduced that

$$-\frac{dV}{dJ} = R_s + \frac{AK_B T}{e}(J_{sc} - J + J_0)^{-1} \quad (2)$$

$$J_{sc} - J = J_0 \left[ \exp\left(\frac{e}{AK_B T}(V + JR_s)\right) - 1 \right] \quad (3)$$

Given the very small amount of  $J_0$  generally, Eq. (2) can be expressed as

$$-\frac{dV}{dJ} = R_s + \frac{AK_B T}{e}(J_{sc} - J)^{-1} \quad (4)$$

Plot  $(-dV/dJ)$  vs  $(J_{sc}-J)^{-1}$  and the linear fit curves according to Eq. (4) of the devices fabricated through one/two steps and with/without TIPD layer at illumination. There is a good linear relationship between  $(-dV/dJ)$  and  $(J_{sc}-J)^{-1}$ . The series resistance  $R_s$  and ideality factor  $A$  of the device, which can be derived from the intercept and slope of the linear fitting results. Moreover, applying the value of  $R_s$  obtained above, plot  $(J_{sc}-J)$  vs  $(V+JR_s)$  and the fit curves

according to Eq. (3). The ideality factor  $A$  and reverse saturated current density  $J_0$  are also derived from the fitting results. The reverse saturated current density ( $J_0$ ) of device with TIPD is  $1.04 \times 10^{-8}$  and  $8.66 \times 10^{-9}$  A/cm<sup>2</sup> for one-step and two-step synthesized perovskite, respectively, two orders higher than that ( $8.80 \times 10^{-6}$  and  $6.39 \times 10^{-7}$  A/cm<sup>2</sup>) of devices without TIPD layer.

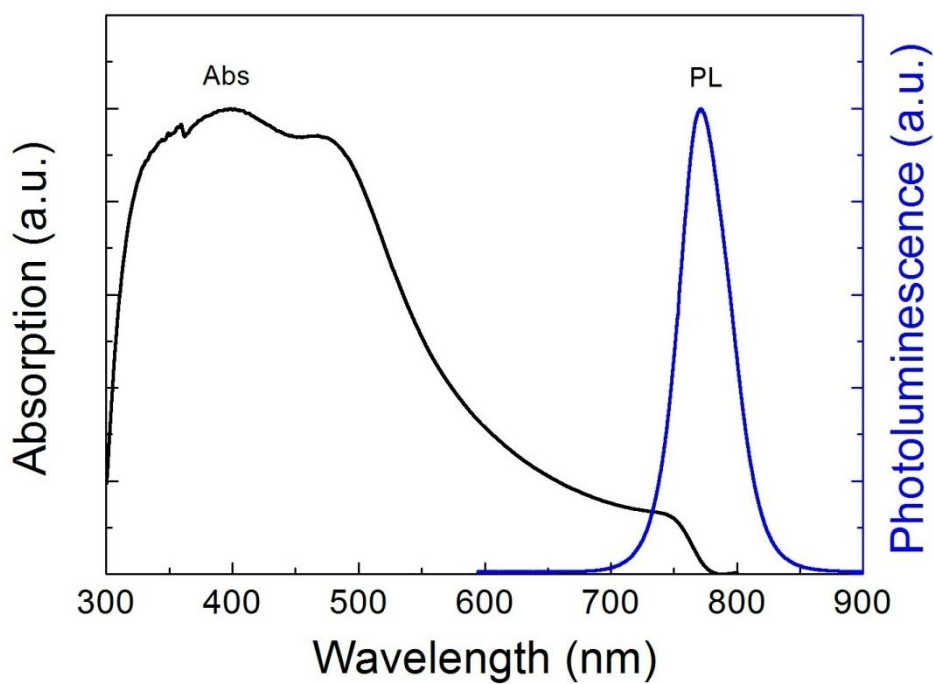

**Figure S1.** Absorption and photoluminescence spectra of two-step synthesized  $\text{CH}_3\text{NH}_3\text{PbI}_3$  perovskite thin film spin-coated on quartz slides.

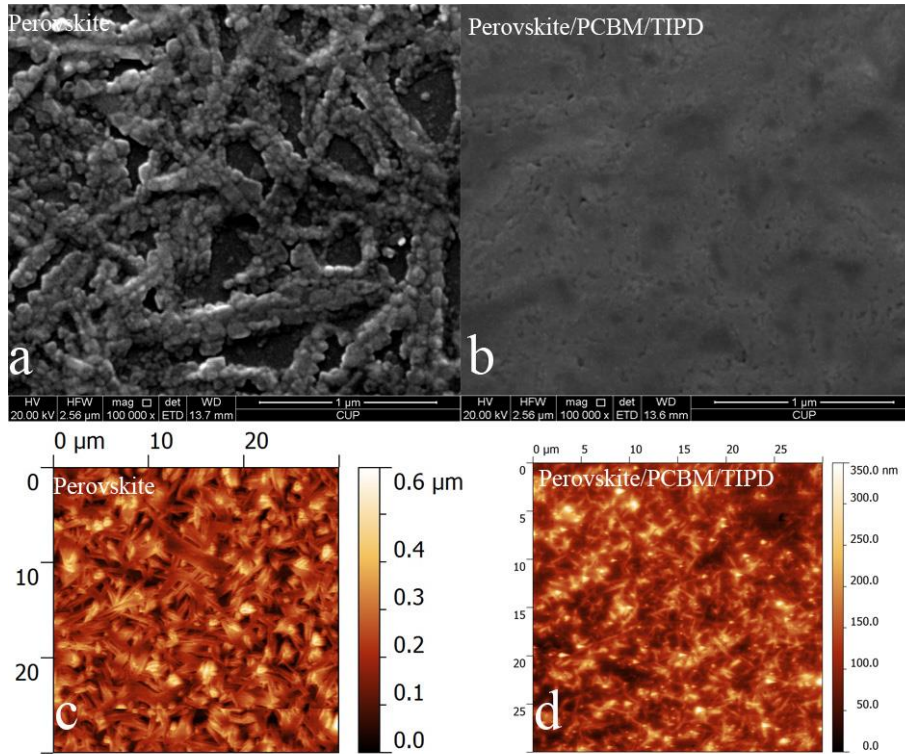

**Figure S2.** (a, b) SEM and (c, d) AFM images of one-step synthesized perovskite and perovskite/PCBM/TIPD layer spin-coated on FTO/PEDOT:PSS substrate, respectively.

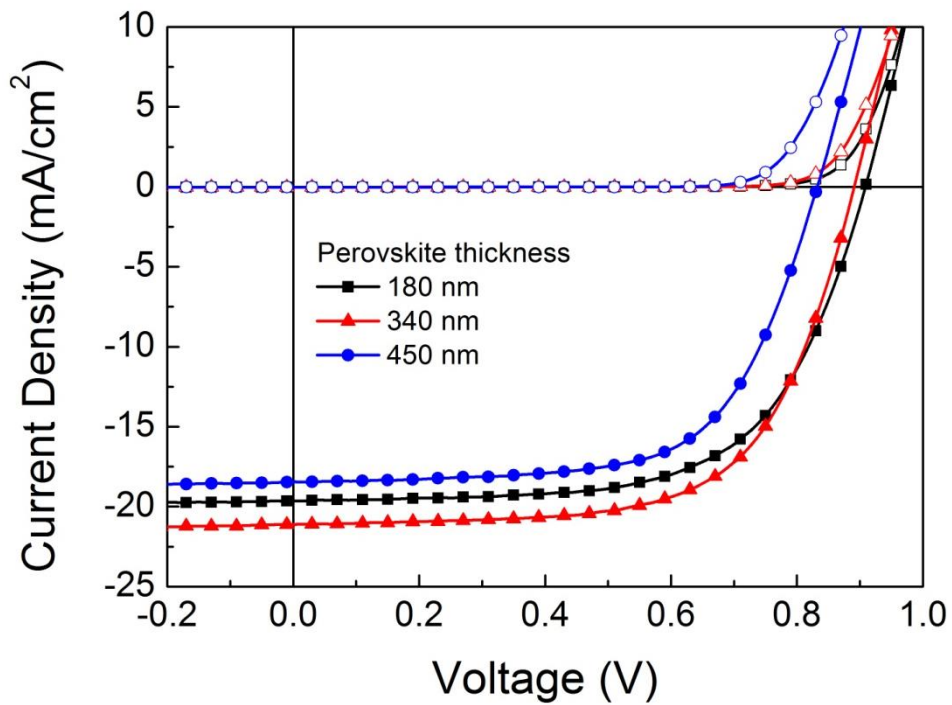

**Figure S3.** *J-V* curves of devices based on two-step synthesized perovskite with different CH<sub>3</sub>NH<sub>3</sub>PbI<sub>3</sub> thickness.

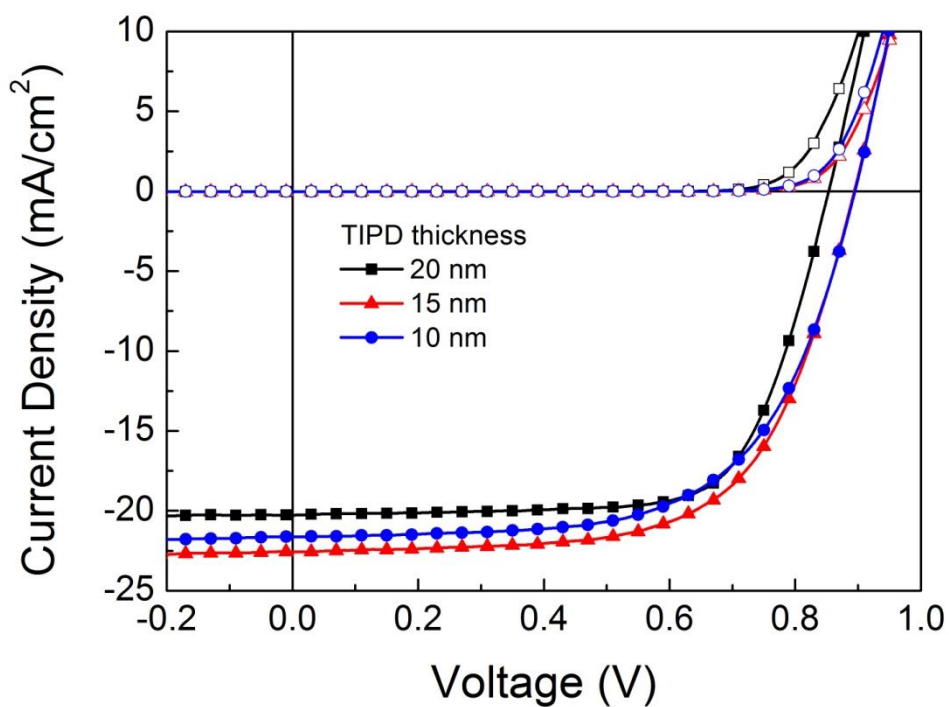

**Figure S4.** *J-V* curves of devices based on two-step synthesized perovskite with different TIPD thickness.

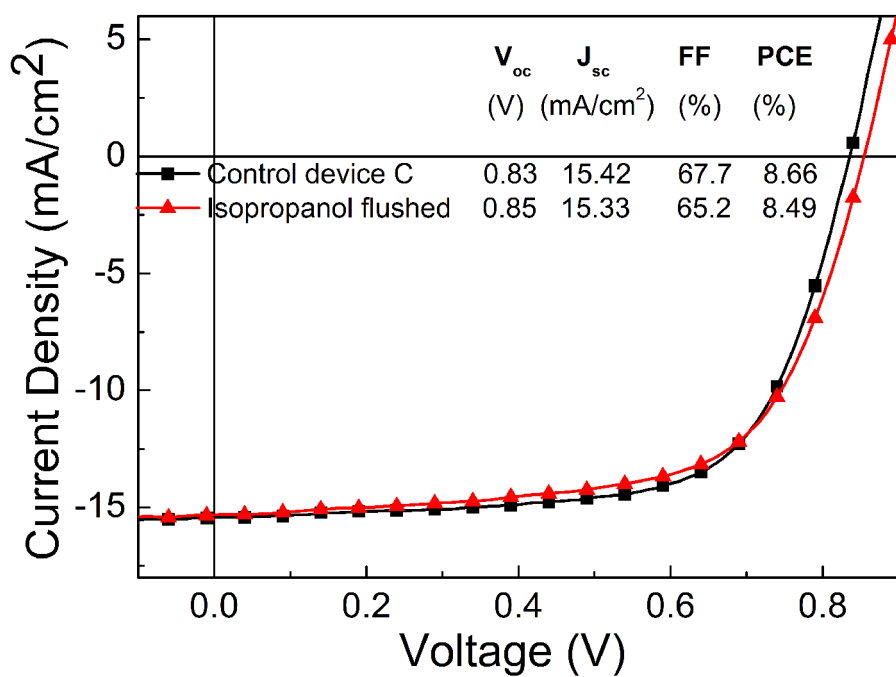

**Figure S5.** *J-V* curves of devices based on two-step synthesized perovskite without and with isopropanol flushed.

**Table S1.** Photovoltaic parameters of the perovskite solar cells with different  $\text{CH}_3\text{NH}_3\text{PbI}_3$  and TIPD layer thickness.

|            | Thickness<br>(nm) | Voc<br>(V) | Jsc<br>( $\text{mA}/\text{cm}^2$ ) | FF<br>(%) | PCE<br>(%) |
|------------|-------------------|------------|------------------------------------|-----------|------------|
| Perovskite | 180               | 0.90       | 19.65                              | 63.9      | 11.30      |
|            | 340               | 0.89       | 21.20                              | 64.4      | 12.15      |
|            | 450               | 0.83       | 18.45                              | 64.7      | 9.91       |
| TIPD       | 20                | 0.85       | 20.20                              | 71.3      | 12.24      |
|            | 15                | 0.89       | 22.57                              | 64.5      | 12.95      |
|            | 10                | 0.89       | 21.61                              | 63.0      | 12.11      |

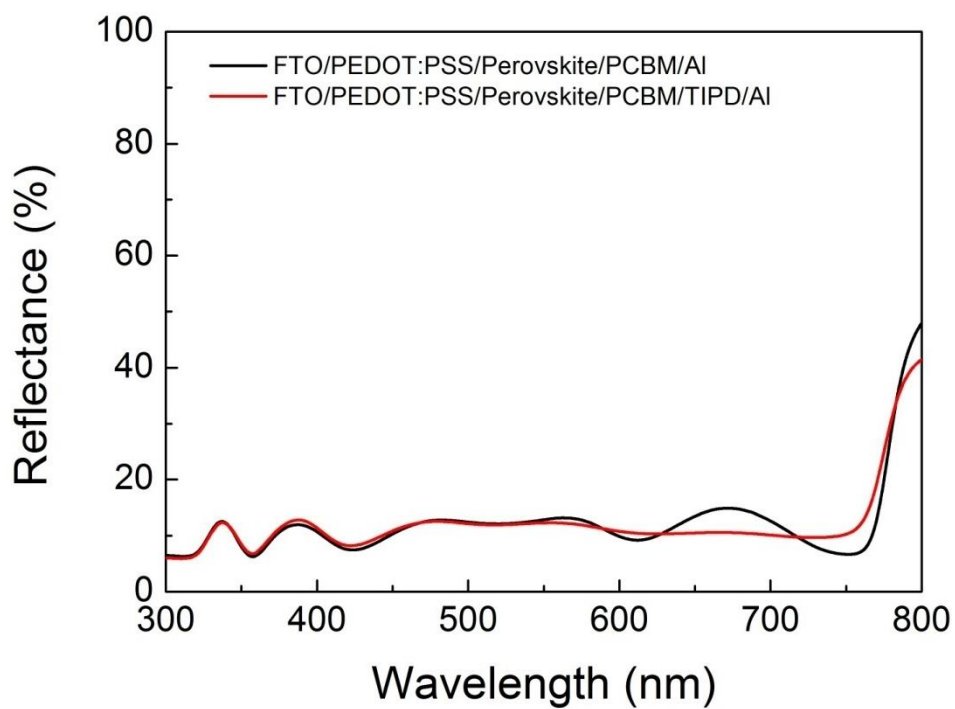

**Figure S6.** Reflection spectra of perovskite solar cells with and without TIPD layer.
